# Supplementary material for: Association Between Allergen Sensitization and Anaphylaxis in Patients Visiting a Pediatric Emergency Department
Source: PubMed Central journal article supplement (PMC8217608; doi:10.3389/fped.2021.651375), 2021-06-08
Supplement: Data_Sheet_1.pdf [file Data_Sheet_1.pdf]

Supplementary Table 1. Clinical characteristics of patients with anaphylaxis who underwent allergy tests (n=74) and a comparison of the severity of anaphylaxis (mild to moderate vs. severe)

|                                            | Total, (%)<br>(N=74) | Mild to moderate, (%) |                         |                     | Total, (%)<br>(n=56) | Severe, (%)        |                        |                    | Total (%)<br>(n=18) |
|--------------------------------------------|----------------------|-----------------------|-------------------------|---------------------|----------------------|--------------------|------------------------|--------------------|---------------------|
|                                            |                      | <2yr=, (%)<br>(n=15)  | ≥2, <6yr, (%)<br>(n=19) | ≥6yr, (%)<br>(n=22) |                      | <2yr, (%)<br>(n=6) | ≥2, <6yr, (%)<br>(n=8) | ≥6yr, (%)<br>(n=4) |                     |
| Sex (male) (%)                             | 47 (63.5)            | 12 (80.0)             | 10 (52.6)               | 15 (68.2)           | 37 (66.1)            | 4 (66.7)           | 6 (75.0)               | 0 (0.0)            | 10 (55.6)           |
| Age (median, years)                        | 4.0 (1.0-7.0)        | 1.0 (0.0-1.0)         | 4.0 (2.0-4.0)           | 10.0 (6.0-13.0)     | 4.0 (1.0-8.0)        | 1.0 (0.0-1.0)      | 3.0 (2.0-4.0)          | 9.0 (7.0-9.0)      | 3.0 (1.0-5.0)       |
| History of allergic disease (%)            | 58 (78.4)            | 8 (53.3)              | 16 (84.2)               | 19 (86.4)           | 43 (76.8)            | 3 (50.0)           | 8 (100.0)              | 4 (100.0)          | 15 (83.3)           |
| Food allergy                               | 33 (44.6)            | 7 (46.7)              | 11 (57.9)               | 6 (27.3)            | 24 (42.9)            | 2 (33.3)           | 5 (62.5)               | 2 (50.0)           | 9 (50.0)            |
| Atopic dermatitis                          | 24 (32.4)            | 5 (33.3)              | 7 (36.8)                | 6 (27.3)            | 18 (32.1)            | 1 (16.7)           | 4 (50.5)               | 1 (25.0)           | 6 (33.3)            |
| Allergic rhinitis                          | 23 (31.1)            | 0 (0.0)               | 8 (42.1)                | 9 (40.9)            | 17 (30.4)            | 0 (0.0)            | 3 (37.5)               | 3 (75.0)           | 6 (33.3)            |
| Asthma                                     | 16 (21.6)            | 0 (0.0)               | 6 (31.6)                | 9 (40.9)            | 15 (26.8)            | 0 (0.0)            | 1 (12.5)               | 0 (0.0)            | 1 (5.6)             |
| Anaphylaxis                                | 8 (10.8)             | 0 (0.0)               | 1 (5.3)                 | 5 (22.7)            | 6 (10.7)             | 0 (0.0)            | 1 (12.5)               | 1 (25.0)           | 2 (11.1)            |
| Drug allergy                               | 3 (4.1)              | 0 (0.0)               | 0 (0.0)                 | 1 (4.5)             | 1 (1.8)              | 0 (0.0)            | 1 (12.5)               | 1 (25.0)           | 2 (11.1)            |
| Urticaria                                  | 1 (1.4)              | 0 (0.0)               | 0 (0.0)                 | 1 (4.5)             | 1 (1.8)              | 0 (0.0)            | 0 (0.0)                | 0 (0.0)            | 0 (0.0)             |
| Family history of allergy (%) <sup>†</sup> | 32 (43.2)            | 7 (46.7)              | 5 (31.6)                | 11 (50.0)           | 23 (41.1)            | 3 (50.5)           | 4 (50.0)               | 2 (50.0)           | 9 (50.0)            |
| Anaphylaxis symptoms & signs               |                      |                       |                         |                     |                      |                    |                        |                    |                     |
| Urticarial rash                            | 64 (86.5)            | 14 (93.3)             | 17 (89.5)               | 18 (81.8)           | 49 (87.5)            | 6 (100.0)          | 6 (75.0)               | 3 (75.0)           | 15 (83.3)           |
| Dyspnea                                    | 55 (74.3)            | 9 (60.0)              | 12 (63.2)               | 21 (95.5)           | 42 (75.0)            | 4 (66.7)           | 6 (75.0)               | 3 (75.0)           | 13 (72.2)           |
| Facial edema                               | 50 (67.6)            | 11 (73.3)             | 13 (68.4)               | 13 (59.1)           | 37 (66.1)            | 5 (83.3)           | 5 (62.5)               | 3 (75.0)           | 13 (72.2)           |
| Wheezing                                   | 23 (31.1)            | 4 (26.7)              | 7 (36.8)                | 5 (22.7)            | 16 (28.6)            | 2 (33.3)           | 5 (62.5)               | 0 (0.0)            | 7 (38.9)            |
| Vomiting                                   | 17 (23.0)            | 7 (46.7)              | 6 (31.6)                | 0 (0.0)             | 13 (23.2)            | 2 (33.3)           | 2 (25.0)               | 0 (0.0)            | 4 (22.2)            |
| Throat tightness                           | 10 (13.5)            | 1 (6.7)               | 2 (10.5)                | 4 (18.2)            | 7 (12.5)             | 0 (0.0)            | 1 (12.5)               | 2 (50.0)           | 3 (16.7)            |
| Abdominal pain                             | 6 (8.1)              | 0 (0.0)               | 2 (10.5)                | 2 (9.1)             | 4 (7.1)              | 0 (0.0)            | 1 (12.5)               | 1 (25.0)           | 2 (11.0)            |
| Nausea                                     | 3 (4.1)              | 0 (0.0)               | 1 (5.3)                 | 1 (4.5)             | 2 (3.6)              | 0 (0.0)            | 0 (0.0)                | 1 (25.0)           | 1 (5.6)             |

\* A comparison of the severity of anaphylaxis (mild to moderate vs. severe).

<sup>†</sup> these include the anaphylaxis, asthma, allergic rhinitis, atopic dermatitis, food allergy, drug allergy, and urticarial history of the family.

Supplementary Table 2. Allergen sensitization rate of allergy tests and the severity of anaphylaxis (mild to moderate vs. severe) (n=74)

|               | Total (n=74), | Mild to moderate (n=56), (%) |               |              |               | Severe (=18), (%) |               |             |               |
|---------------|---------------|------------------------------|---------------|--------------|---------------|-------------------|---------------|-------------|---------------|
|               | (%)           | <2yr, (%)                    | ≥2, <6yr, (%) | ≥6yr, (%)    | Total, (%)    | <2yr, (%)         | ≥2, <6yr, (%) | ≥6yr, (%)   | Total, (%)    |
| All allergens | 64/74 (86.5%) | 15/15 (100.0)                | 16/19 (84.2)  | 19/22 (86.4) | 50/56 (89.2%) | 4/6 (66.7)        | 6/8 (75.0)    | 4/4 (100.0) | 14/18 (77.8%) |
| All food      | 48/71 (67.6%) | 15/15 (100.0)                | 14/19 (73.7)  | 6/20 (30.0)  | 35/54 (64.8%) | 4/6 (66.7)        | 6/8 (75.0)    | 3/3 (100.0) | 13/17 (76.5%) |
| Egg           | 32/63 (50.8%) | 14/15 (93.3)                 | 7/17 (41.1)   | 1/15 (6.7)   | 22/47 (46.8%) | 4/6 (66.7)        | 5/7 (71.4)    | 1/3 (33.3)  | 10/16 (62.5%) |
| Milk          | 21/57 (36.8%) | 7/15 (46.7)                  | 6/14 (42.9)   | 0/15 (0.0)   | 13/44 (29.5%) | 3/6 (50.0)        | 4/8 (50.0)    | 1/4 (25.0)  | 8/13 (61.5%)  |
| Nuts          | 29/60 (48.3%) | 9/13 (69.2)                  | 8/16 (50.0)   | 3/15 (20.0)  | 20/44 (45.5%) | 2/5 (40.0)        | 6/8 (75.0)    | 1/3 (33.3)  | 9/16 (56.3%)  |
| Wheat         | 14/49 (28.6%) | 2/11 (22.2)                  | 4/12 (33.3)   | 5/13 (38.5)  | 11/36 (30.6%) | 0/4 (0.0)         | 1/4 (25.0)    | 2/5 (40.0)  | 3/13 (23.1%)  |
| Crustacean    | 6/43 (10.3%)  | 3/10 (30.0)                  | 0/11 (0.0)    | 0/13 (0.0)   | 3/34 (8.8%)   | 0/2 (0.0)         | 2/3 (66.7)    | 1/4 (25.0)  | 3/9 (33.3%)   |
| All inhalants | 36/62 (58.1%) | 3/8 (37.5)                   | 10/18 (55.6)  | 18/22 (81.8) | 31/48 (64.6%) | 0/4 (0.0)         | 1/6 (16.7)    | 4/4 (100.0) | 5/14 (35.7%)  |
| Mite          | 30/59 (50.8%) | 1/10 (10.0)                  | 10/17 (58.8)  | 15/19 (78.9) | 26/46 (56.5%) | 0/3 (0.0)         | 1/6 (16.7)    | 3/4 (75.0)  | 4/13 (30.8%)  |
| Animal        | 12/47 (25.5%) | 1/5 (20.0)                   | 3/13 (23.1)   | 7/19 (36.8)  | 11/37 (29.7%) | 0/3 (0.0)         | 0/3 (0.0)     | 1/4 (25.0)  | 1/10 (10.0%)  |
| Tree          | 19/53 (35.8%) | 1/5 (20.0)                   | 4/15 (26.7)   | 10/20 (50.0) | 15/40 (37.5%) | 0/4 (0.0)         | 1/5 (20.0)    | 3/4 (75.0)  | 4/13 (30.8%)  |

\*A comparison of the severity of anaphylaxis (mild to moderate vs. severe).

† $P < 0.05$

Supplementary Table 3. Comparison of anaphylactic triggers with the allergic sensitizations of patients

|                         | All allergen sensitization | All food sensitization | Egg sensitization | Milk sensitization | Nuts sensitization | Wheat sensitization | Crustacean sensitization | All inhalant sensitization | Mite sensitization | Animal sensitization | Tree sensitization |
|-------------------------|----------------------------|------------------------|-------------------|--------------------|--------------------|---------------------|--------------------------|----------------------------|--------------------|----------------------|--------------------|
| <b>Triggers</b>         |                            |                        |                   |                    |                    |                     |                          |                            |                    |                      |                    |
| Food (n=41)             | 39 (95.1%)                 | 35 (85.4%)             | 24 (58.5%)        | 16 (39.0%)         | 21 (51.2%)         | 9 (22.0%)           | 3 (7.3%)                 | 16 (39.0%)                 | 13 (31.7%)         | 35 (85.4%)           | 24 (58.5%)         |
| Immune therapy (n=8)    | 8 (100.0%)                 | 3 (37.5%)              | 2 (25.0%)         | 0 (0.0%)           | 1 (12.5%)          | 0 (0.0%)            | 1 (12.5%)                | 8 (100.0%)                 | 8 (100.0%)         | 5 (62.5%)            | 5 (62.5%)          |
| Exercise (n=3)          | 3 (100.0%)                 | 1 (33.3%)              | 0 (0.0%)          | 0 (0.0%)           | 1 (33.3%)          | 0 (0.0%)            | 0 (0.0%)                 | 3 (100.0%)                 | 1 (33.3%)          | 1 (33.3%)            | 3 (100.0%)         |
| Drug (n=4)              | 2 (50.0%)                  | 0 (0.0%)               | 0 (0.0%)          | 0 (0.0%)           | 0 (0.0%)           | 0 (0.0%)            | 0 (0.0%)                 | 2 (50.0%)                  | 1 (25.0%)          | 1 (25.0%)            | 1 (25.0%)          |
| <b>Food triggers</b>    |                            |                        |                   |                    |                    |                     |                          |                            |                    |                      |                    |
| Egg (n=6)               | 6 (100.0%)                 | 6 (100.0%)             | 6 (100.0%)        | 1 (16.7%)          | 0 (0.0%)           | 2 (33.3%)           | 0 (0.0%)                 | 1 (16.7%)                  | 0 (0.0%)           | 1 (16.7%)            | 0 (0.0%)           |
| Milk (n=8)              | 7 (87.5%)                  | 7 (87.5%)              | 7 (87.5%)         | 6 (75.0%)          | 5 (62.5%)          | 1 (12.5%)           | 0 (0.0%)                 | 0 (0.0%)                   | 0 (0.0%)           | 0 (0.0%)             | 0 (0.0%)           |
| Nuts (n=11)             | 10 (90.9%)                 | 9 (81.8%)              | 3 (27.3%)         | 2 (18.2%)          | 8 (72.7%)          | 0 (0.0%)            | 1 (9.1%)                 | 6 (54.5%)                  | 6 (54.5%)          | 1 (9.1%)             | 1 (9.1%)           |
| Wheat (n=3)             | 3 (100.0%)                 | 3 (100.0%)             | 1 (33.3%)         | 1 (33.3%)          | 2 (66.7%)          | 2 (66.7%)           | 1 (33.3%)                | 0 (0.0%)                   | 0 (0.0%)           | 0 (0.0%)             | 0 (0.0%)           |
| Crustacean (n=2)        | 2 (100.0%)                 | 2 (100.0%)             | 1 (50.0%)         | 1 (50.0%)          | 1 (50.0%)          | 0 (0.0%)            | 1 (50.0%)                | 0 (0.0%)                   | 0 (0.0%)           | 0 (0.0%)             | 0 (0.0%)           |
| Buckwheat (n=1)         | 1 (100.0%)                 | 1 (100.0%)             | 0 (0.0%)          | 0 (0.0%)           | 0 (0.0%)           | 0 (0.0%)            | 0 (0.0%)                 | 1 (100.0%)                 | 0 (0.0%)           | 0 (0.0%)             | 1 (100.0%)         |
| Fish (n=1)              | 1 (100.0%)                 | 0 (0.0%)               | 0 (0.0%)          | 0 (0.0%)           | 0 (0.0%)           | 0 (0.0%)            | 0 (0.0%)                 | 1 (100.0%)                 | 1 (100.0%)         | 0 (0.0%)             | 0 (0.0%)           |
| Unspecified foods (n=9) | 6 (100.0%)                 | 6 (100.0%)             | 6 (100.0%)        | 1 (16.7%)          | 5 (55.6%)          | 4 (44.4%)           | 0 (0.0%)                 | 1 (16.7%)                  | 0 (0.0%)           | 1 (16.7%)            | 0 (0.0%)           |

Supplementary Table 4. Comparison of anaphylactic triggers with the symptoms and sign of anaphylaxis

|                         | Urticarial rash | Facial edema | Throat tightness | Dyspnea    | Wheezing   | Hypotension | Abdominal pain | Vomiting   |
|-------------------------|-----------------|--------------|------------------|------------|------------|-------------|----------------|------------|
| <b>Triggers</b>         |                 |              |                  |            |            |             |                |            |
| Food (n=41)             | 35 (85.4%)      | 29 (70.7%)   | 7 (17.1%)        | 28 (68.3%) | 17 (41.5%) | 4 (9.8%)    | 4 (9.8%)       | 17 (41.5%) |
| Immune therapy (n=8)    | 6 (75.0%)       | 3 (37.5%)    | 0 (0.0%)         | 8 (100.0%) | 3 (37.5%)  | 0 (0.0%)    | 0 (0.0%)       | 0 (0.0%)   |
| Exercise (n=3)          | 3 (100.0%)      | 2 (66.7%)    | 1 (33.3%)        | 3 (100.0%) | 1 (33.3%)  | 0 (0.0%)    | 0 (0.0%)       | 0 (0.0%)   |
| Drug (n=4)              | 1 (25.0%)       | 3 (75.0%)    | 1 (25.0%)        | 2 (50.0%)  | 0 (0.0%)   | 1 (25.0%)   | 0 (0.0%)       | 0 (0.0%)   |
| <b>Food triggers</b>    |                 |              |                  |            |            |             |                |            |
| Egg (n=6)               | 5 (83.5%)       | 4 (66.7%)    | 0 (0.0%)         | 3 (50.0%)  | 1 (16.7%)  | 0 (0.0%)    | 0 (0.0%)       | 2 (33.3%)  |
| Milk (n=8)              | 6 (75.0%)       | 4 (50.0%)    | 1 (12.5%)        | 4 (50.0%)  | 3 (37.5%)  | 1 (12.5%)   | 0 (0.0%)       | 6 (75.0%)  |
| Nuts (n=11)             | 11 (100.0%)     | 9 (81.8%)    | 3 (27.3%)        | 5 (45.5%)  | 4 (36.4%)  | 3 (27.3%)   | 1 (9.1%)       | 5 (45.5%)  |
| Wheat (n=3)             | 3 (100.0%)      | 3 (100.0%)   | 0 (0.0%)         | 3 (100.0%) | 3 (100.0%) | 0 (0.0%)    | 0 (0.0%)       | 1 (33.3%)  |
| Crustacean (n=2)        | 2 (100.0%)      | 2 (100.0%)   | 0 (0.0%)         | 2 (100.0%) | 2 (100.0%) | 0 (0.0%)    | 1 (50.0%)      | 0 (0.0%)   |
| Buckwheat (n=1)         | 1 (100.0%)      | 1 (100.0%)   | 1 (100.0%)       | 1 (100.0%) | 0 (0.0%)   | 0 (0.0%)    | 0 (0.0%)       | 0 (0.0%)   |
| Fish (n=1)              | 1 (100.0%)      | 1 (100.0%)   | 1 (100.0%)       | 1 (100.0%) | 0 (0.0%)   | 0 (0.0%)    | 0 (0.0%)       | 0 (0.0%)   |
| Unspecified foods (n=9) | 6 (66.7%)       | 5 (55.6%)    | 1 (11.1%)        | 9 (100.0%) | 4 (44.4%)  | 0 (0.0%)    | 2 (22.2%)      | 3 (33.3%)  |
